# Supplementary material for: A joint proteomic and genomic investigation provides insights into the mechanism of calcification in coccolithophores
Source: Nat Commun. 2023 Jun 23;14:3749. doi: 10.1038/s41467-023-39336-1 (PMC10290126; doi:10.1038/s41467-023-39336-1)
Supplement: Supplementary file 6 — Supplementary Data 3 [file 41467_2023_39336_MOESM6_ESM.xlsx]

## Sheet: candidate CV proteins
Protein ID	Protein Probability	Percentage coverage	Peptide count	Indistinguishable proteins	Modified peptides	C-cells spectral counts F1	C-cells spectral counts F2	C-cells spectral counts F3	C-cells spectral counts F4	C-cells spectral counts F5	N-cells spectral counts F1	N-cells spectral counts F2	N-cells spectral counts F3	N-cells spectral counts F4	N-cells spectral counts F5	Putative locus	ORF length	ORF completeness	Pfam domains	EggNog_text	Identical Emihu1 proteins	Emihu1 annotation	localization	orthogroup	OG age	OG notes	Number of transmembrane domains	% Disordered	% low complexity
Br33122.t1	0.9998	2.468	2	Br33122.t1,Br44959.t1	none	0	1	0	0	0	0	0	0	0	0	NA	1661	NA	None	NA	255976	none	other localisation	OG0011266	Phaocystales	NA	4	78.8079	52.9199
Br8569.t1	0.9997	14.068	2	Br8569.t1,Br33743.t1	none	0	1	0	0	0	0	0	0	0	0	NA	263	NA	None	NA		none	other localisation	OG0000948	Archaeplastida	NA	0	99.6198	52.8517
EhG10089.2	1	5.276	2	EhG35593.2,EhG10089.4,EhG10089.1,EhG10089.3,EhG10089.2,EhG35593.3,EhG35593.1	none	2	2	5	1	0	0	0	0	0	0	EhG35593	398	complete	NA	NA		none	other localisation	OG0000312	Archaeplastida	NA	0	79.397	36.4322
EhG12212.4	1	27.737	3	EhG12212.3,EhG11860.2,EhG12212.4	none	4	4	3	0	0	0	0	0	0	0	EhG11860	137	complete	FoP_duplication|PF13865.6|8.6e-06	NA	2.78882e+23	none	other localisation	OG0008230	Phaocystales	NA	0	73.7226	43.0657
EhG15825.1	0.9991	0.63	2	EhG39357.3,EhG15825.9,EhG39357.6,EhG15825.5,EhG15825.11,EhG15825.8,EhG15825.10,EhG39357.2,EhG15825.12,EhG15825.1,EhG15825.2,EhG39357.5,EhG15825.6,EhG15825.4,EhG39357.7,EhG39357.9	none	0	0	1	0	0	0	0	0	0	0	EhG39357	396	complete	ATP-synt_ab|PF00006.25|7.8e-54,ATP-synt_ab_N|PF02874.23|4.8e-11	ATP hydrolysis coupled proton transport		none	other localisation	OG0001065	Archaeplastida	NA	0	14.1414	0
EhG19611.2	0.9972	8.812	2	EhG19611.2,Br28321.t2,Br28321.t1	none	2	0	2	0	0	0	0	0	0	0	EhG19997	261	complete	zf-CCCH|PF00642.24|1.6e-06,zf_CCCH_4|PF18345.1|1.8e-05,zf-CCCH_4|PF18044.1|2.1e-05	NA		none	other localisation	OG0009070	Prymnesiales	NA	0	99.6169	56.3218
EhG30140.1	0.9997	0.594	2	EhG30139.15,Br43262.t1,EhG26417.1,EhG217.32,EhG26415.2,EhG30140.11,EhG25944.1,EhG30140.15,EhG217.4,EhG30140.12,EhG30140.10,EhG217.36,EhG217.5,EhG30140.3,EhG30139.12,EhG217.2,Br7143.t1,EhG217.15,EhG20832.26,EhG30140.19,EhG26417.7,EhG20832.41,EhG26415.1,EhG29114.3,EhG217.3,EhG30139.13,EhG26417.6,EhG26417.19,EhG30139.21,EhG25944.2,EhG20832.9,EhG20832.43,EhG15336.3,EhG20832.34,EhG26417.16,EhG20832.4,…	none	0	1	2	0	0	0	0	0	0	0	EhG26002,EhG26415,EhG26417,EhG30139	376	complete	Actin|PF00022.19|1.8e-148	cytoskeleton organization	196492,196496,211737,211739,226524,230496,230498,254155,42943,42973,43459,43529,44100,44106,44107,44108,44109,44110,44153,44178,44190,44198,44203,44206,44207,44213,44215,44217,44907,50581,61495,61500,61506,61552,61562,61728,66475,66477,66499,66507,66516,66541,70835,71942,71945,71948,71950,71963,71967,77406,77416,275570,275571,278859,278861,281683,282455,282457,285654,86278,86279,86280,86281,86282…	Defline:putative actin:Mark van der Giezen:2009-09-10	other localisation	OG0000027	Archaeplastida	NA	0	17.5532	0
EhG32303.1	1	27.419	3	EhG32303.1,EhG4286.1	none	0	4	0	0	0	0	0	0	0	0	EhG4286	124	complete	NA	NA		none	other localisation	NA	NA	No Orthogroup	0	92.7419	66.9355
EhG3571.1	0.9998	7.812	2	Br14432.t1,EhG12593.1,Br25821.t1,EhG3571.1	none	1	0	0	0	0	0	0	0	0	0	EhG12593	256	complete	NA	NA		none	other localisation	OG0009454	Haptophyta	NA	0	99.6094	56.6406
EhG3936.1	0.999	0.642	2	EhG5364.10,EhG3936.15,EhG3936.17,EhG5364.21,EhG5364.20,EhG3936.6,EhG5364.7,EhG3936.24,EhG5364.12,EhG3936.3,EhG3936.5,EhG3936.13,EhG5364.18,EhG3936.11,EhG3936.12,EhG3936.7,EhG5364.14,EhG5364.5,EhG5364.11,EhG3936.2,EhG3936.1	none	2	2	0	0	0	0	0	0	0	0	EhG5364	604	complete	ATP-synt_ab|PF00006.25|1.1e-103,ATP-synt_ab_N|PF02874.23|8e-15,ATP-synt_ab_Xtn|PF16886.5|1.6e-43	proton-transporting ATPase activity, rotational mechanism	2.22386e+133	none	other localisation	OG0000836	Archaeplastida	NA	0	14.9007	0
EhG4286.1	1	27.419	3	EhG4286.1,EhG32303.1	none	5	0	7	4	0	0	0	0	0	0	EhG32303	124	complete	NA	NA		none	other localisation	NA	NA	No Orthogroup	0	92.7419	66.9355
EhG43321.1	1	32.432	3	EhG15791.1,EhG43321.1	none	4	4	8	1	0	0	0	0	0	0	EhG15791	74	complete	NA	NA	111811	none	other localisation	OG0055284	NA	NA	NA	98.6486	36.4865
EhG9823.3	1	0.441	2	EhG9823.9,EhG7640.1,EhG8172.27,EhG9823.5,EhG8172.30,EhG8172.9,EhG31490.1,EhG9823.3,EhG9823.24,EhG9823.18,EhG9823.31,EhG8172.2,EhG9823.7,EhG8172.11,EhG9823.42,EhG9823.38,EhG8172.6,EhG8172.20,EhG8172.7,EhG9823.39,EhG9823.47,EhG9823.41,EhG9823.29,EhG9823.23,EhG9823.17,EhG9823.35,EhG9823.19,EhG8172.28,EhG9823.15	none	0	3	0	0	0	0	0	0	0	0	EhG8172	704	complete	HSP90|PF00183.18|6.9e-235,HATPase_c|PF02518.26|1.9e-12,HATPase_c_3|PF13589.6|1.4e-09	unfolded protein binding	8.90873e+58	none	other localisation	OG0000110	Archaeplastida	NA	0	36.3636	14.9148
EhG9994.5	0.9993	0.409	2	EhG42205.17,EhG9994.26,EhG9994.49,EhG42205.41,EhG42205.28,EhG9994.45,EhG9994.30,EhG9994.69,EhG9994.66,EhG42205.12,EhG42205.35,EhG9994.22,EhG9994.25,EhG42205.2,EhG42205.23,EhG42205.38,EhG42205.4,EhG42205.7,EhG42205.32,EhG42205.40,EhG42205.42,EhG9994.5,EhG9994.48,EhG42205.14,EhG42205.31,EhG9994.46,EhG42205.5,EhG9994.31,EhG42205.1,EhG9994.33,EhG42205.19,EhG9994.44,EhG42205.21,EhG42205.11,EhG42205.64…	none	0	2	0	0	0	0	0	0	0	0	EhG42205	302	complete	NA	ATP binding		none	other localisation	NA	NA	No Orthogroup	0	62.2517	9.93377

## Sheet: Legend
			Protein ID	Lead protein ID of protein group
			Putative locus	Concatenation of protein IDs that may be allelic. Two proteins sharing the same putative locus ID are putative allels. Theis information is not provided for Bracker pipeline derrived IDs
			Indistinguishable proteins	Proteins indistinguishable in this experiment based on the available MS evidence
			Protein Probability	1 - posterior error probability, as calculated by Protein Prophet
			Percentage coverage	Percentage of the sequence covered by the peptides identified
			Peptide count	Number of unique peptides assigned to the protein
			Modified peptides	Sequence, modification site and mass of modified peptides
			Spectral count	Number of spectra counts summed accross all conditions and replicates
			C-cells spectral counts F1	Spectral counts in Fraction 1 of the C-cell data
			C-cells spectral counts F2
			C-cells spectral counts F3
			C-cells spectral counts F4
			C-cells spectral counts F5
			N-cells spectral counts F1
			N-cells spectral counts F2
			N-cells spectral counts F3
			N-cells spectral counts F4
			N-cells spectral counts F5
			ORF length
			ORF completeness	If the ORF was classed as complete by Transdecoder or gmst during the ORF finding process. If labelled incomplete this may be an incomplete gene model.
			Identical Emihu1 proteins	Proteins in the Emihu1 database 100% identical to this protein
			Emihu1 annotation	Annotation of any identical proteins in the Emihu1 database
			localization	Localization as predicted by Hectare
			orthogroup	Orthogroup ID
			OG age	Age of the orthogroup this protein belongs to
			OG notes
			Annotation	Annotation based on EggNOG annotation
			Pfam domains	Pfam terms: comma separated, giving name, code and e-value
			Number of transmembrane domains
			% Disordered
			% low complexity
