# Supplementary material for: A joint proteomic and genomic investigation provides insights into the mechanism of calcification in coccolithophores
Source: Nat Commun. 2023 Jun 23;14:3749. doi: 10.1038/s41467-023-39336-1 (PMC10290126; doi:10.1038/s41467-023-39336-1)
Supplement: Supplementary file 7 — Supplementary Data 4 [file 41467_2023_39336_MOESM7_ESM.xlsx]

## Sheet: Coccosphere Std-Ca specific
Protein ID	Putative locus	Indistinguishable proteins	Protein Group ID	Protein Probability	Percentage coverage	Peptide count	Modified peptides	Spectral count	StdCa rep 1	StdCa rep2	StdCa rep3	StdCa rep4	LowCa rep1	LowCa rep2	LowCa rep3	LowCa rep4	LowCa sum	StdCa sum	Normalized spectral counts	localization	Pfam terms	Identical Emihu1 proteins	Emihu1 annotation	orthogroup	OG age	OG notes	ORF completeness	Annotation	Functional category	Further information	Number of transmembrane domains
Br32137.t1	Bracker	Br32137.t1	CAP124	1	41.211	20	VVEETS[167]AQEK,ATQSNQEGAS[167]PDALNR,AAAVGS[167]PVPPGVLEAEGGAGHQAASER,VVEETS[167]AQEKR,S[167]DDSEAAFEK,TEHIQTAYAS[167]DDSAR,DSVDS[167]FEAYVDQIAAAK	82	23	24	22	13	0	0	0	0	0	82	12.1123	other localisation	None		none	OG0023426	Gephyrocapsa	Coccolithophore specific in 2/6 species	NA	NA	NA	NA	0
Br35525.t2	Bracker	Br35525.t2	CAP61	1	17.065	6	none	10	2	4	4	0	0	0	0	0	0	10	1.70648	other localisation	None		none	OG0033564	NA	NA	NA	NA	NA	NA	0
Br44321.t1	Bracker	Br44321.t1	CAP66	1	9.41	10	SLVPSADPFGPLDGGS[167]PSADAAADDR	27	8	12	7	0	0	0	0	0	0	27	2.01643	other localisation	None		none	OG0085182	E_huxleyi	Coccolithophore specific in 1/6 species	NA	Caspase and IQ domains	Cell death	No other prots in NCBI with this domain combination, EMIHUDRAFT_222459 similar	0
Br46715.t1	Bracker	Br46715.t1	CAP61	0.9998	18.132	6	none	9	2	3	4	0	0	0	0	0	0	9	1.64835	other localisation	None		none	OG0033564	NA	NA	NA	NA	NA	NA	0
Br51871.t1	Bracker	Br51871.t1,Br37927.t1	CAP63	1	5.234	2	none	10	0	2	4	4	0	0	0	0	0	10	2.75482	other localisation	None	98177	none	OG0000054	Archaeplastida	NA	NA	SMP-30/Gluconolactonase/LRE-like region	unknown		0
Br52857.t1	Bracker	Br2550.t1,Br52857.t1	CAP57	1	4.561	3	none	11	3	2	4	2	0	0	0	0	0	11	1.85811	other localisation	None		none	OG0033315	NA	NA	NA	NA	NA	NA	0
Br55050.t1	Bracker	Br55050.t1	CAP66	1	8.59	8	SLVPSADPFGPLDGGS[167]PSADAAADDR	25	9	9	7	0	0	0	0	0	0	25	1.78955	other localisation	None		none	OG0085182	E_huxleyi	Coccolithophore specific in 1/6 species	NA	Caspase with IQ domain	Cell death	EMIHUDRAFT_222459 same domain organisation, no other NCBI example; IQ motif – Ca independent calmodulin binding	0
EhG10211.1	EhG21324EhG10211	EhG10211.1,Br39663.t1,EhG21324.2,EhG21324.3,EhG10211.2,EhG10211.3,EhG10211.4,EhG21324.4,Br30278.t1	CAP58	1	2.945	4	none	19	4	3	8	4	0	0	0	0	0	19	1.21639	signal peptide	Peripla_BP_6|PF13458.6|2.4e-21,ANF_receptor|PF01094.28|6.9e-23,ANF_receptor|PF01094.28|2e-51,Peripla_BP_6|PF13458.6|3.7e-09	408161361202	none	OG0001943	Archaeplastida	NA	complete	Receptor family ligand binding region	unknown	extracellular ligand bindin	2
EhG10535.4	EhG30799EhG10534	EhG10535.4,EhG10534.2	CAP78	1	71.56	6	none	29	0	17	11	1	0	0	0	0	0	29	26.6055	other localisation	NA	243178118113	none	OG0003934	SAR/Hapista	NA	complete	NA	NA	NA	0
EhG1079.1	EhG31937EhG1079	EhG1079.1	CAP79	1	38.565	6	none	18	3	8	6	1	0	0	0	0	0	18	8.07175	other localisation	Pribosyltran|PF00156.27|4.2e-13	2.09863e+53	none	OG0006800	Archaeplastida	NA	complete	Phosphoribosyltransferase domain	unknown		0
EhG11049.1	EhG4387EhG11049	Br6370.t1,EhG11049.2,Br46310.t1,EhG11049.1,EhG4387.1	CAP69	1	22.388	5	none	20	4	2	7	7	0	0	0	0	0	20	7.46269	signal peptide	ShK|PF01549.24|1.8e-09,ShK|PF01549.24|3.1e-07,ShK|PF01549.24|4.2e-06,ShK|PF01549.24|3.9e-07,ShK|PF01549.24|1.7e-05,ShK|PF01549.24|2.3e-07	408918408919	none	OG0001265	Haptophyta	NA	complete	ShK domain-like containing	unknown	Stichodactyla toxin is 35 AA basic peptide with K channel blocking capacity	0
EhG12182.3	EhG12182EhG11894	EhG12182.3,Br36549.t1,EhG11894.1	CAP62	1	27.982	7	none	19	2	0	7	10	0	0	0	0	0	19	8.7156	other localisation	NA	4.05786e+23	none	OG0003163	Archaeplastida	NA	complete	NA	NA	NA	0
EhG12232.6	EhG12232EhG11836	EhG11836.8,EhG11836.6,EhG12232.1,EhG11836.1,EhG12232.6	CAP83	1	31.206	10	none	46	9	17	8	12	0	0	0	0	0	46	16.3121	other localisation	NA		none	OG0005602	SAR/Hapista	NA	complete	NA	NA	NA	0
EhG12333.1	EhG28445EhG12333	EhG12333.1	CAP190	0.9959	20.264	6	none	25	6	11	4	4	0	0	0	0	0	25	11.0132	signal peptide	NA	4.03968e+23	none	OG0023544	Isochrysidales	NA	complete	NA	NA	NA	0
EhG13763.1	EhG13763EhG13762	EhG13763.1,Br20418.t2	CAP3	1	10	3	none	10	4	0	3	3	0	0	0	0	0	10	8.33333	other localisation	NA	2.08441e+47	none	OG0027580	Isochrysidales	NA	complete	NA	NA	NA	0
EhG13973.1	EhG41913EhG13973	EhG13973.1,EhG41913.1,Br34679.t1,EhG41913.2,EhG13973.3,EhG13973.2,EhG13973.4,Br27789.t1	CAP6	1	1.909	3	none	10	1	2	5	2	0	0	0	0	0	10	0.707214	other localisation	NA	8738987391262080	none	OG0000004	Archaeplastida	NA	complete	Myosin VI	Cytoskeleton	Only actin motor that moves to negative end, recruited to clathrin coated pits and uncoated vesicles, latter depends on PDZ domain	0
EhG15142.1	EhG16391EhG15142	EhG15142.1	CAP92	1	13.087	6	none	12	4	6	2	0	0	0	0	0	0	12	1.70697	other localisation	NA		none	OG0010627	NA	NA	complete	NA	NA	NA	0
EhG15359.1	EhG34668EhG15359	EhG15359.1,EhG34668.1	CAP93	1	20	2	none	10	0	4	2	4	0	0	0	0	0	10	6.66667	signal peptide	NA	228877	none	OG0032584	NA	NA	complete	NA	NA	NA	1
EhG15690.1	EhG1654EhG15690	EhG15690.1,Br10511.t1,EhG1654.1	CAP152	0.9999	4.634	2	none	4	1	1	1	1	0	0	0	0	0	4	0.597907	signal peptide	NA		none	OG0004401	Calcihaptophyta	NA	complete	NA	NA	NA	1
EhG16060.1	EhG33663EhG16060	EhG33663.1,EhG16060.9,EhG16060.22,EhG33663.5,EhG16060.18,EhG16060.5,EhG16060.1	CAP94	1	4.314	15	none	54	9	13	15	17	0	0	0	0	0	54	18	other localisation	NA	2.71169e+47	none	OG0003710	NA	NA	complete	NA	NA	NA	0
EhG16487.2	EhG18903EhG16487	EhG16487.2	CAP16	1	4.975	4	none	14	4	4	4	2	0	0	0	0	0	14	1.74129	other localisation	NA	253970123248	none	OG0000140	Archaeplastida	NA	complete	ADP-ribosyltransferase exoenzyme	PTM		0
EhG16641.1	EhG19045EhG16641	EhG19045.3,EhG16641.1,EhG19045.2	CAP153	0.9999	9.901	2	none	6	1	2	2	1	0	0	0	0	0	6	5.94059	signal peptide	NA	197020275676	none	OG0027297	NA	NA	complete	NA	NA	NA	0
EhG17315.2	EhG38292EhG17315	EhG17315.2,EhG38292.1,EhG17315.1,EhG38292.2	CAP18	1	6.683	2	none	8	2	4	2	0	0	0	0	0	0	8	1.90931	other localisation	NA	2.78161e+41	none	OG0001773	Phaocystales	NA	complete	NA	NA	NA	0
EhG187.1	EhG20861EhG187	EhG187.1,EhG20861.34,EhG187.28,EhG20861.32,EhG187.7	CAP99	1	3.616	14	none	38	4	11	8	15	0	0	0	0	0	38	11.6208	signal peptide	NAD_binding_1|PF00175.21|1.7e-19		none	OG0000218	Archaeplastida	NA	complete	Oxidoreductase NAD-binding domain	Redox		0
EhG19599.2	EhG21353EhG20011EhG19599EhG10240	EhG10240.1,EhG21353.2,EhG19599.2,EhG21353.1,EhG19599.1,EhG20011.2,EhG20011.3	CAP75	1	19.689	3	none	10	1	4	3	2	0	0	0	0	0	10	5.18135	other localisation	EF-hand_9|PF14658.6|0.00012,EF-hand_5|PF13202.6|0.00092,EF-hand_8|PF13833.6|1.7e-13,EF-hand_5|PF13202.6|1.3e-06,EF-hand_6|PF13405.6|5.8e-09,EF-hand_9|PF14658.6|2.5e-09,EF-hand_8|PF13833.6|6.9e-16,EF-hand_5|PF13202.6|3.4e-06,EF-hand_1|PF00036.32|7.1e-10,EFhand_Ca_insen|PF08726.10|0.00064,EF-hand_4|PF12763.7|0.00016,EF-hand_1|PF00036.32|2.8e-09,EF-hand_7|PF13499.6|5e-18,EF-hand_6|PF13405.6|1.9e-09,…		none	OG0000008	Archaeplastida	NA	complete	EF-hand domain pair protein	unknown		0
EhG19893.1	EhG2565EhG19893	EhG19893.1,EhG19893.2,EhG2565.1	CAP104	1	28.205	4	none	10	1	2	2	5	0	0	0	0	0	10	8.54701	other localisation	NA	2.01609e+34	none	OG0002114	Archaeplastida	NA	complete	NA	NA	NA	0
EhG20031.1	EhG36909EhG20031EhG10692	EhG20031.1,EhG20031.3,EhG20031.2	CAP105	1	21.453	4	none	9	2	2	2	3	0	0	0	0	0	9	3.11419	signal peptide	NA	114510	none	OG0001450	Archaeplastida	NA	complete	NA	NA	NA	0
EhG20853.1	EhG20853.1	EhG20853.1,Br51742.t1	CAP10	1	5.647	2	none	6	0	1	2	3	0	0	0	0	0	6	1.41176	other localisation	AAT|PF03417.16|4.9e-08		none	OG0011957	Phaocystales	NA	complete	Likely peptidase	unknown	Acyl-coenzyme A:6-aminopenicillanic acid acyl-transferase is last enzyme in penecilling biosyntheisis. Here possible cysteine peptidase	0
EhG21640.2	EhG25441EhG21640	EhG21640.2	CAP107	1	17.057	6	IASEYS[167]TEKDPTLVKR	15	4	6	3	2	0	0	0	0	0	15	5.01672	other localisation	IMP2_N|PF18590.1|1.4e-19,IMP2_C|PF18591.1|0.00052		none	OG0001816	SAR/Hapista	NA	complete	Immune Mapped Protein 2 (IMP2) N-terminal domain	unknown		0
EhG21927.2	EhG21927EhG19732	EhG19732.2,EhG21927.4,EhG21927.2,EhG21927.1,EhG19732.1	CAP102	1	23.077	6	none	23	3	8	5	7	0	0	0	0	0	23	8.04196	other localisation	ShK|PF01549.24|0.00033,ShK|PF01549.24|0.0004,ShK|PF01549.24|2.3e-07,ShK|PF01549.24|1.7e-07,ShK|PF01549.24|4.5e-09,ShK|PF01549.24|6.1e-08		none	OG0023371	E_huxleyi	Coccolithophore specific in 1/6 species	complete	ShK domain-like containing	unknown	Stichodactyla toxin is 35 AA basic peptide with K channel blocking capacity	0
EhG22148.6	EhG8580EhG22148	Br4727.t1,EhG22148.4,EhG8580.2,EhG22148.6,Br51492.t1	CAP71	0.9998	20.195	8	none	34	6	8	12	8	0	0	0	0	0	34	11.0749	signal peptide	ShK|PF01549.24|1.2e-09,ShK|PF01549.24|1.9e-07,ShK|PF01549.24|2.1e-09,ShK|PF01549.24|0.00034,ShK|PF01549.24|1.4e-07		none	OG0001265	Haptophyta	NA	complete	ShK domain-like containing	unknown	Stichodactyla toxin is 35 AA basic peptide with K channel blocking capacity	0
EhG22148.8	EhG8580EhG22148	EhG22148.8	CAP71	0.9998	23.95	8	none	32	6	6	12	8	0	0	0	0	0	32	13.4454	signal peptide	ShK|PF01549.24|1.4e-09,ShK|PF01549.24|8e-10,ShK|PF01549.24|2.5e-09,ShK|PF01549.24|0.00076,ShK|PF01549.24|9.6e-08		none	OG0001265	Haptophyta	NA	complete	ShK domain-like containing	unknown	Stichodactyla toxin is 35 AA basic peptide with K channel blocking capacity	0
EhG22535.1	EhG35498EhG22535	EhG35498.1,EhG22535.1,EhG35498.2	CAP108	1	18.338	6	none	10	1	5	3	1	0	0	0	0	0	10	2.86533	other localisation	PH|PF00169.29|3.3e-16		none	OG0007202	Archaeplastida	NA	complete	PH domain protein	unknown	Can act in phosphatidylinositol binding and membrae recruitment of proteins	0
EhG23465.1	EhG23465EhG14450	Br12182.t1,EhG14450.1,EhG23465.1	CAP49	1	18.137	4	none	6	3	1	2	0	0	0	0	0	0	6	2.94118	signal peptide	Pro_isomerase|PF00160.21|6.7e-26		none	OG0000707	Archaeplastida	NA	complete	Cyclophilin type peptidyl-prolyl cis-trans isomerase/CLD	Protein folding		0
EhG23961.1	EhG23961EhG11615	Br35658.t1,EhG23961.1,EhG11615.1	CAP7	1	8.592	5	none	9	3	2	1	3	0	0	0	0	0	9	1.64534	other localisation	Glyco_hydro_32N|PF00251.20|1e-23,Glyco_hydro_32C|PF08244.12|6.1e-05		none	OG0001913	Archaeplastida	NA	complete	Glycosyl hydrolases family 32	CHO metabolism		0
EhG24336.1	EhG2959EhG24336	EhG24336.1,EhG2959.1	CAP160	0.9999	10.638	3	none	7	0	2	1	4	0	0	0	0	0	7	2.12766	other localisation	NA	95506	none	OG0011051	Phaocystales	NA	complete	NA	NA	NA	0
EhG25061.1	EhG31424EhG25061	EhG25061.1,EhG25061.2,EhG31424.1	CAP110	1	8.036	13	ILS[167]FNRK	30	5	10	9	6	0	0	0	0	0	30	1.91327	other localisation	NA		none	OG0000004	Archaeplastida	NA	complete	Myosin head (motor domain)	Cytoskeleton		0
EhG28445.2	EhG28445EhG12333	EhG28445.1,EhG28445.2	CAP276	0.9921	20.628	5	none	25	6	11	4	4	0	0	0	0	0	25	11.2108	signal peptide	NA	4.11375e+47	none	OG0023544	Isochrysidales	NA	complete	NA	NA	NA	0
EhG28688.1	EhG42982EhG28688	EhG42982.6,EhG42982.12,EhG42982.11,EhG28688.13,EhG28688.26,EhG28688.15,EhG42982.2,EhG28688.3,EhG28688.11,EhG28688.10,EhG42982.14,EhG42982.1,EhG42982.25,EhG28688.1	CAP116	1	1.71	6	none	10	1	7	1	1	0	0	0	0	0	10	2.12314	other localisation	SAT|PF16073.5|3.8e-05,Acyl_transf_1|PF00698.21|9.5e-21		none	OG0000543	Archaeplastida	NA	complete	Acyl transferase domain	Fatty acid metabolism	Possible MALONYL-COA ACP TRANSACYLASE	0
EhG28914.4	EhG8610EhG28914	EhG28914.1,EhG28914.3,EhG28914.4	CAP117	1	13.218	3	none	4	2	1	1	0	0	0	0	0	0	4	2.29885	other localisation	NA	2.47421e+71	none	OG0040612	NA	NA	complete	NA	NA	NA	1
EhG28981.1	EhG41256EhG28981	Br1203.t1,EhG41256.1,EhG28981.1,Br14777.t1	CAP116	1	8.738	4	none	9	2	3	2	2	0	0	0	0	0	9	1.74757	other localisation	NA		none	OG0003706	Prymnesiales	NA	complete	NA	NA	NA	2
EhG2901.4	EhG2901EhG24389	EhG2901.4,Br40925.t1,EhG24389.1,EhG2901.3	CAP64	1	31.756	27	none	101	12	51	19	19	0	0	0	0	0	101	12.5778	other localisation	NA		none	OG0001773	Phaocystales	NA	complete	PH domain protein	unknown	Can act in phosphatidylinositol binding and membrae recruitment of proteins	0
EhG2970.1	EhG2970EhG24328	EhG2970.1,EhG24328.1	CAP21	1	7.078	3	none	16	4	2	6	4	0	0	0	0	0	16	2.40964	other localisation	NA		none	OG0002551	Haptophyta	NA	complete	NA	NA	NA	0
EhG30140.1	EhG5620EhG5619EhG30140EhG30139EhG29114EhG26417EhG26415EhG26002EhG25944EhG217EhG20832EhG15336	EhG20832.37,EhG217.50,EhG25947.1,EhG30140.10,EhG30139.11,EhG217.34,EhG20832.32,EhG20832.44,EhG29114.5,Br15253.t1,EhG217.15,Br43262.t1,EhG29114.1,EhG30139.21,EhG217.18,EhG20832.41,EhG30140.4,Br16606.t1,EhG20832.9,Br7143.t1,EhG30140.2,EhG30140.11,EhG26417.7,EhG217.36,EhG30140.1,EhG20832.6,EhG29114.3,EhG20832.7,EhG30139.13,EhG15336.2,EhG217.35,EhG217.3,EhG217.30,EhG20832.10,EhG30140.6,EhG26417.1,EhG…	CAP52	1	2.013	8	none	31	4	13	8	6	0	0	0	0	0	31	8.24468	other localisation	Actin|PF00022.19|1.8e-148	196492,196496,211737,211739,226524,230496,230498,254155,42943,42973,43459,43529,44100,44106,44107,44108,44109,44110,44153,44178,44190,44198,44203,44206,44207,44213,44215,44217,44907,50581,61495,61500,61506,61552,61562,61728,66475,66477,66499,66507,66516,66541,70835,71942,71945,71948,71950,71963,71967,77406,77416,275570,275571,278859,278861,281683,282455,282457,285654,86278,86279,86280,86281,86282…	Defline:putative actin:Mark van der Giezen:2009-09-10	OG0000027	Archaeplastida	NA	complete	Actin	Cytoskeleton		0
EhG310.1	EhG34275EhG310	EhG310.1,EhG310.5,EhG34275.2	CAP121	1	16.425	4	none	7	1	4	2	0	0	0	0	0	0	7	3.38164	signal peptide	NA		none	OG0011229	NA	NA	complete	NA	NA	NA	1
EhG31040.1	EhG38443EhG31040	EhG31040.1	CAP122	1	13.221	6	none	17	4	10	1	2	0	0	0	0	0	17	4.08654	other localisation	Ank|PF00023.30|0.00078,Ank_2|PF12796.7|5.3e-06,Ank_5|PF13857.6|0.00025,Ank_2|PF12796.7|3.5e-09,Ank_4|PF13637.6|4e-06,Ank_3|PF13606.6|6.4e-05,Ank_4|PF13637.6|3.5e-08,Ank_5|PF13857.6|4.8e-06,Ank_4|PF13637.6|8.1e-06,Ank_5|PF13857.6|0.0002,Ank_5|PF13857.6|7.5e-07,Ank_4|PF13637.6|0.0008,Ank_2|PF12796.7|7.4e-05,Ank|PF00023.30|0.0003,Ank_5|PF13857.6|0.00012,Ank_4|PF13637.6|0.00055,Ank_2|PF12796.7|2e-16,…		none	OG0017579	Archaeplastida	NA	5primepartial	Ankyrin repeat protein	unknown	Protein protein interactions	0
EhG31109.3	EhG3295EhG31109	EhG3295.1,EhG3295.4,EhG3295.2,EhG31109.2,Br25219.t1,EhG31109.4,EhG3295.3,EhG31109.1,EhG31109.3	CAP56	1	5.882	4	none	14	2	4	4	4	0	0	0	0	0	14	2.65655	other localisation	LCIB_C_CA|PF18599.1|2.6e-62		none	OG0001053	Archaeplastida	NA	complete	Beta carbonic anydrase	Carbonate metabolism		0
EhG31238.1	EhG31238.1	EhG31238.1,EhG31238.2	CAP24	1	19.474	5	none	23	3	2	9	9	0	0	0	0	0	23	12.1053	other localisation	NA		none	OG0018664	Gephyrocapsa	Coccolithophore specific in 2/6 species	complete	NA	NA	NA	0
EhG31641.2	EhG43970EhG31641	EhG31641.4,Br45791.t1,EhG43970.3,EhG31641.2,EhG31641.1,EhG43970.1,EhG31641.3	CAP68	1	10	4	none	12	1	7	4	0	0	0	0	0	0	12	2.06897	other localisation	NA		none	OG0023627	E_huxleyi	Coccolithophore specific in 1/6 species	complete	NA	NA	NA	0
EhG31961.1	EhG31961.1	EhG31961.1	CAP123	1	3.707	3	none	9	4	3	2	0	0	0	0	0	0	9	0.834106	other localisation	SH3_9|PF14604.6|1e-05,PDZ_6|PF17820.1|0.00077,Pkinase_Tyr|PF07714.17|8.8e-39,Pkinase_fungal|PF17667.1|7e-07,Pkinase|PF00069.25|9.4e-53		none	OG0000015	Archaeplastida	NA	complete	Protein kinase domain	PTM		0
EhG33119.2	EhG33119EhG29946	EhG33119.2	CAP124	1	45.876	25	VVEETS[167]AQEK,ATQSNQEGAS[167]PDALNR,AAAVGS[167]PVPPGVLEAEGGAGHQAASER,VVEETS[167]AQEKR,S[167]DDSEAAFEK,VVEETS[167]AQEKRVNDQLAPLVSPR,DSVDS[167]FEAYVDQIAAAK,TEHIQTAYAS[167]DDSAR	118	32	43	29	14	0	0	0	0	0	118	17.0767	other localisation	NA	275444	none	OG0023426	Gephyrocapsa	Coccolithophore specific in 2/6 species	complete	NA	NA	NA	0
EhG33272.1	EhG4774EhG34604EhG33272EhG19361	EhG4774.3,EhG4774.4,EhG34604.4,EhG4774.2,EhG33272.1,EhG19361.1,EhG19361.2	CAP100	1	4.628	3	none	11	2	5	2	2	0	0	0	0	0	11	1.81818	signal anchor	MAM|PF00629.23|4.5e-31		none	OG0005437	NA	NA	complete	MAM domain containing	unknown	MAM is an extracellular adhesive domain, proteins generally with 1TM, diverse functions	0
EhG33980.1	EhG906EhG33980	Br23177.t1,Br18745.t1,EhG33980.1,EhG906.1	CAP164	0.9997	3.6	2	DADEGRPS[167]DK	5	1	0	2	2	0	0	0	0	0	5	1	other localisation	Bestrophin|PF01062.21|1.1e-10		none	OG0000360	Archaeplastida	NA	complete	Bestrophin/UPF0187 type chloride channel	Ion transport		3
EhG35076.1	EhG44628EhG35076	EhG35076.1,EhG44628.3,EhG44628.4	CAP126	1	1.864	2	none	9	1	2	2	4	0	0	0	0	0	9	0.578406	other localisation	ABC_membrane|PF00664.23|4.1e-18,ABC_tran|PF00005.27|2e-24,ABC_tran|PF00005.27|9.5e-16,ABC_membrane|PF00664.23|4.6e-37		none	OG0000019	Archaeplastida	NA	complete	ABC transporter	Solute transport		12
EhG35403.2	EhG35403EhG1058	EhG35403.2,EhG35403.1,EhG1058.1	CAP13	1	18.02	4	none	19	2	10	5	2	0	0	0	0	0	19	4.82234	other localisation	NIF|PF03031.18|4.6e-52		none	OG0000212	Archaeplastida	NA	complete	Phosphtase	PTM		0
EhG35482.22	EhG35482EhG35481EhG12830	EhG35482.22	CAP99	1	35.78	9	none	42	6	13	6	17	0	0	0	0	0	42	12.844	other localisation	NA		none	OG0000218	Archaeplastida	NA	complete	Ferredoxin oxidoreductase	Redox		0
EhG35482.6	EhG35482EhG35481EhG12830	EhG35482.6	CAP99	1	28.671	9	none	26	3	9	4	10	0	0	0	0	0	26	9.09091	other localisation	NAD_binding_1|PF00175.21|1.4e-26		none	NA	NA	No Orthogroup	5primepartial	Oxidoreductase NAD-binding domain	Redox	Possible Ferredoxin NADP reductase (chloroplast)	0
EhG35787.1	EhG40096EhG35787	EhG35787.1,EhG40096.1	CAP128	1	30.627	9	none	29	4	12	6	7	0	0	0	0	0	29	10.7011	other localisation	NA	2.13486e+23	none	OG0015429	Phaocystales	NA	complete	NA	NA	NA	0
EhG35934.1	EhG35934EhG35855	EhG35934.1,EhG35855.2	CAP129	1	12.991	4	none	10	0	6	2	2	0	0	0	0	0	10	3.02115	other localisation	NUDIX|PF00293.28|1.4e-10		none	OG0000219	Archaeplastida	NA	complete	NUDIX domain	unknown	Found in pyrophosphohydrolases, act on NDP-X, eg nucleotide sugars, polyphosphates, dNTPs, capped mRNAs	0
EhG37108.1	EhG37108EhG32049	Br20116.t1,EhG37108.1	CAP165	0.9997	9.815	5	none	20	7	8	1	4	0	0	0	0	0	20	3.7037	other localisation	NA		none	OG0017214	NA	NA	complete	NA	NA	NA	0
EhG37683.1	EhG37683EhG28875	EhG37683.2,EhG37683.1,Br13337.t1	CAP50	1	16.736	3	none	6	0	2	3	1	0	0	0	0	0	6	2.51046	other localisation	NA		none	OG0020730	Gephyrocapsa	Coccolithophore specific in 2/6 species	complete	NA	NA	NA	0
EhG37998.2	EhG37998EhG10391	EhUM12543,EhUM11513,EhG37998.1,EhUM13136,EhG37998.2,EhUM13031,EhUM3955,EhUM11911	CAP131	1	19	3	none	7	0	4	2	1	0	0	0	0	0	7	7	other localisation	Cpn10|PF00166.21|5.7e-30	2.0961e+95	Defline:Mitochondrial Cpn10:Bryony Williams:2009-09-10	OG0000821	Archaeplastida	NA	complete	Chaperonin 10 Kd subunit	Protein folding		0
EhG39182.1	EhG39182EhG14188	Br23575.t1,EhG39182.1,Br782.t1,EhG14188.1	CAP4	1	6.09	2	none	5	2	1	2	0	0	0	0	0	0	5	0.801282	other localisation	Kinesin|PF00225.23|2.4e-96,Microtub_bd|PF16796.5|3.8e-21		none	OG0032604	E_huxleyi	Coccolithophore specific in 1/6 species	complete	Kinesin motor domain	Cytoskeleton		0
EhG39306.2	EhG44471EhG39306EhG24680	EhG24680.1,EhG39306.1,EhG39306.2,EhG24680.2,EhG44471.1,EhG44471.2,EhG24680.3,EhG44471.3	CAP182	0.9983	4.954	2	none	5	0	1	2	2	0	0	0	0	0	5	1.54799	other localisation	Cyanate_lyase|PF02560.14|1.2e-17		none	OG0004969	Archaeplastida	NA	complete	Cyanate lyase	Detoxification		0
EhG40126.1	EhG40126EhG16134EhG16133	EhG40126.11,EhG40126.41,EhG40126.17,EhG40126.13,EhG40126.12,EhG16133.17,EhG40126.15,EhG40126.21,EhG16133.14,EhG16133.1,EhG16133.3,EhG40126.16,EhG40126.26,EhG40126.14,EhG40126.60,EhG40126.20,EhG40126.27,EhG40126.2,EhG16133.6,EhG40126.48,EhG40126.4,EhG40126.44,EhG40126.35,EhG40126.57,EhG40126.18,EhG40126.32,EhG40126.54,EhG16133.10,EhG40126.8,EhG40126.33,EhG40126.56,EhG40126.42,EhG40126.1,EhG40126.1…	CAP95	1	0.44	2	none	11	2	2	3	4	0	0	0	0	0	11	1.72684	signal anchor	Na_Ca_ex|PF01699.24|6.4e-24,Na_Ca_ex|PF01699.24|2e-22		none	OG0000741	E_huxleyi	Coccolithophore specific in 1/6 species	complete	Sodium/calcium exchanger protein	Ion transport		11
EhG40835.3	EhG40835EhG10365	EhG40835.2,EhG40835.3,Br44614.t1,EhG10365.1	CAP8	1	7.765	3	none	5	0	1	1	3	0	0	0	0	0	5	1.17647	signal peptide	NA		none	OG0012727	Isochrysidales	NA	complete	NA	NA	NA	1
EhG42190.1	EhG9981EhG42190	EhG42190.1,EhG9981.1,EhG42190.2	CAP26	1	4.717	2	none	19	7	8	2	2	0	0	0	0	0	19	4.48113	signal anchor	NA	2.84028e+95	none	OG0000680	Haptophyta	NA	complete	Magnesium transporter NIPA	Ion transport		9
EhG42278.1	EhG44341EhG43130EhG42278	EhG42278.1	CAP27	1	2.164	2	none	10	0	2	4	4	0	0	0	0	0	10	1.13895	signal peptide	NA	125456	none	OG0004574	Gephyrocapsa	Coccolithophore specific in 2/6 species	complete	NA	NA	NA	0
EhG42616.1	EhG42616.1	EhG42616.1,EhG43232.1	CAP134	1	12.13	8	none	46	9	12	12	13	0	0	0	0	0	46	6.48801	signal peptide	Glyco_hydro_16|PF00722.21|0.00017,Glyco_hydro_16|PF00722.21|0.00049	246261	none	OG0010398	Prymnesiales	NA	complete	Glycoside hydrolase family 16	CHO metabolism		0
EhG43031.1	EhG43031.1	EhG43031.1	CAP135	1	27.224	10	ELS[167]GEAK	27	7	7	7	6	0	0	0	0	0	27	7.27763	other localisation	NA	4.03718e+41	none	OG0040597	Gephyrocapsa	Coccolithophore specific in 2/6 species	complete	NA	NA	NA	0
EhG4339.2	EhG25918EhG15318	EhG25918.2,EhG15318.1,EhG4339.1,EhG4339.2,EhG25918.4,EhG25918.1,EhG4339.6,EhG4339.4,EhG15318.2,EhG4339.3,EhG4339.5,EhG15318.3,EhG25918.3,EhG25918.5	CAP15	1	9.615	2	none	11	3	1	3	4	0	0	0	0	0	11	5.28846	other localisation	NA		none	OG0010063	Prymnesiales	NA	complete	NA	NA	NA	0
EhG4644.3	EhG4644EhG11720	EhG4644.3,EhG4644.5,EhG11720.2	CAP81	1	35.294	11	none	24	5	9	8	2	0	0	0	0	0	24	6.72269	other localisation	NA		none	OG0014383	Prymnesiales	NA	complete	NA	NA	NA	0
EhG5573.1	EhG5573EhG29073	EhG5573.1,EhG5573.2,EhG29073.1	CAP23	1	8.834	3	none	32	11	5	6	10	0	0	0	0	0	32	11.3074	other localisation	NA	278730	none	OG0041421	Gephyrocapsa	Coccolithophore specific in 2/6 species	complete	NA	NA	NA	0
EhG6615.6	EhG749EhG6615EhG6614EhG6613	EhG749.14,EhG749.19,EhG749.18,EhG749.8,EhG749.13,EhG749.6,EhG6615.6,EhG749.17,EhG6615.3,EhG749.12,EhG6615.15,EhG6615.12,EhG6615.5,EhG6615.11,EhG6615.4,EhG749.20,EhG6615.8	CAP156	0.9999	1.749	2	none	9	1	2	3	3	0	0	0	0	0	9	1.31195	other localisation	AMP-binding|PF00501.28|4.4e-83	8.90724e+52	none	OG0000136	Archaeplastida	NA	complete	AMP-binding enzyme	Fatty acid metabolism	PTHR43272 LONG-CHAIN-FATTY-ACID--COA LIGASE 1.1E-157	0
EhG7414.1	EhG7414EhG35275	EhG35275.1,EhG35275.3,EhG7414.1,EhG35275.4,EhG7414.3	CAP127	1	4.234	3	none	6	1	2	0	3	0	0	0	0	0	6	0.747198	other localisation	NA		none	OG0002102	Archaeplastida	NA	complete	NA	NA	NA	0
EhG8056.2	EhG9708EhG8056	EhG8056.2,EhG9708.1	CAP140	1	18.596	7	none	20	3	3	3	11	0	0	0	0	0	20	7.01754	signal peptide	NA	2.82942e+29	none	OG0026811	Calcihaptophyta	NA	complete	ShK domain-like containing	unknown	Stichodactyla toxin is 35 AA basic peptide with K channel blocking capacity	0
EhG9381.7	EhG9381EhG32198	EhG9381.7	CAP47	1	18.519	4	none	9	1	3	2	3	0	0	0	0	0	9	8.33333	other localisation	NA		none	OG0000824	Archaeplastida	NA	complete	NA	NA	NA	0
EhG9529.10	EhG9529EhG27159	EhG27159.9,EhG27159.6,EhG9529.10,EhG9529.11,EhG9529.12	CAP113	1	6.782	5	none	33	6	4	10	13	0	0	0	0	0	33	4.7619	other localisation	HCO3_cotransp|PF00955.21|5.5e-62,HCO3_cotransp|PF00955.21|2.7e-65		none	OG0000138	Archaeplastida	NA	complete	HCO3- transporter family	Ion transport		9

## Sheet: Coccosphere Low and Std Ca
Protein ID	Putative locus	Indistinguishable proteins	Protein Group ID	Protein Probability	Percentage coverage	Peptide count	Modified peptides	Spectral count	StdCa rep 1	StdCa rep2	StdCa rep3	StdCa rep4	LowCa rep1	LowCa rep2	LowCa rep3	LowCa rep4	LowCa sum	StdCa sum	Normalized spectral counts	localization	Pfam terms	Identical Emihu1 proteins	Emihu1 annotation	orthogroup	OG age	OG notes	ORF completeness	Annotation	Functional category	Further information	Number of transmembrane domains
EhG10998.2	EhG10998.2	EhG10998.2	CAP80	1	24.786	2	none	22	6	4	6	4	0	0	2	0	2	20	18.8034	signal peptide	NA	224138361561	none	OG0015596	Phaocystales	NA	complete	NA	NA	NA	0
EhG13953.1	EhG13953.1	EhG13953.1,EhG13953.11,EhG13953.17,EhG13953.3,EhG13953.13,EhG13953.8	CAP159	0.9999	1.06	3	NAS[167]SSQLTTPTQDATM[147]DEEAATAR,NAS[167]SSQLTTPTQDATMDEEAATAR,VSS[167]STNLLIVK	22	5	7	6	3	0	0	1	0	1	21	6.70732	other localisation	Na_Ca_ex|PF01699.24|5.4e-27		none	OG0000199	Archaeplastida	NA	complete	Sodium/calcium exchanger protein	Ion transport		6
EhG14715.1	EhG29596EhG14715	EhG14715.1,EhG29596.1	CAP90	1	30.303	3	none	16	1	4	4	3	1	0	2	1	4	12	16.1616	other localisation	NA	246066	none	OG0041176	E_huxleyi	Coccolithophore specific in 1/6 species	complete	NA	NA	NA	0
EhG14858.1	EhG6375EhG14858	EhG14858.1,EhG6375.1,EhG6375.3	CAP91	1	41.463	9	none	25	3	3	6	8	0	0	5	0	5	20	15.2439	other localisation	Pro_isomerase|PF00160.21|4.4e-47	369290316064	none	OG0000022	Archaeplastida	NA	complete	Cyclophilin type peptidyl-prolyl cis-trans isomerase/CLD	Protein folding		0
EhG17600.1	EhG6879EhG17600	EhG17600.1,EhG6879.1	CAP98	1	26.692	14	none	41	5	13	5	13	0	1	4	0	5	36	7.93037	signal peptide	Pyr_redox|PF00070.27|1.2e-12,Pyr_redox_3|PF13738.6|7.1e-14,Pyr_redox_2|PF07992.14|5.5e-54,Pyr_redox_dim|PF02852.22|7.5e-27,FAD_oxidored|PF12831.7|7.3e-05	4.06708e+29	none	OG0000285	Archaeplastida	NA	complete	Pyridine nucleotide-disulphide oxidoreductase, dimerisation domain	Redox	Possible Glutathione reductase	0
EhG21010.1	EhG30715EhG21010	EhG21010.1,EhG30715.1	CAP82	1	6.282	5	none	54	8	4	14	14	6	0	5	3	14	40	4.58404	other localisation	NA	365562314615	none	OG0004401	Calcihaptophyta	NA	complete	NA	NA	NA	1
EhG25426.2	EhG25426EhG19499	EhG25426.1,EhG25426.2,EhG19499.1,EhG19499.2	CAP19	1	14.925	2	none	9	2	3	1	1	0	0	2	0	2	7	6.71642	other localisation	NA		none	OG0004016	Archaeplastida	NA	complete	Stress responsive A/B Barrel Domain containing protein	unknown		0
EhG28015.6	EhG42824EhG28015	EhG42824.2,EhG42824.1,EhG28015.6,EhG28015.7	CAP114	1	65.217	14	none	78	15	21	16	19	0	2	3	2	7	71	56.5217	other localisation	Cofilin_ADF|PF00241.20|7.2e-37	8.84489e+68	none	OG0000593	Archaeplastida	NA	complete	Cofilin/tropomyosin-type actin-binding protein	Cytoskeleton	Promotes actin depolymerization	0
EhG28484.1	EhG28484EhG12371	EhG28484.1,Br14997.t1,EhG12371.2,EhG12371.1	CAP51	1	28.131	16	LNGIYT[181]R	52	5	15	12	13	0	3	4	0	7	45	10.0193	signal peptide	Pyr_redox_3|PF13738.6|6e-16,Pyr_redox_2|PF07992.14|8.9e-54,Pyr_redox_dim|PF02852.22|1.5e-31,Pyr_redox|PF00070.27|2.5e-14,FAD_oxidored|PF12831.7|0.00015,FAD_binding_2|PF00890.24|0.00044		none	OG0000285	Archaeplastida	NA	complete	Glutathione reductase	ROS metabolism		0
EhG35395.1	EhG35395EhG1052	EhG35395.4,EhG35395.2,EhG1052.1,EhG35395.1,EhG35395.3,EhG1052.2	CAP77	1	1.243	4	none	15	3	4	2	4	0	0	2	0	2	13	0.504032	other localisation	NA	4.05293e+35	none	OG0000246	Archaeplastida	NA	complete	Inositol 1,4,5-trisphosphate/ryanodine receptor	Ion transport		6
EhG41822.3	EhG42442EhG41822	EhG41822.4,EhG41822.3,EhG42442.1,EhG41822.2	CAP132	1	32.593	4	none	81	18	10	19	27	0	0	7	0	7	74	60	other localisation	NA	8.91689e+62	none	OG0001419	Archaeplastida	NA	complete	Cytochrome C oxidase, cbb3-type, subunit III	Respiration	mitochnodrial	0
EhG44190.1	EhG44190EhG42794	EhG44190.1	CAP136	1	19.067	9	none	26	4	8	4	4	0	2	4	0	6	20	5.27383	other localisation	Pyr_redox_dim|PF02852.22|2.7e-29,FAD_binding_2|PF00890.24|2.1e-05,Pyr_redox_3|PF13738.6|6.4e-07,Pyr_redox|PF00070.27|3.6e-14,Pyr_redox_2|PF07992.14|6.9e-56	2.80719e+50	none	OG0000285	Archaeplastida	NA	complete	Pyridine nucleotide-disulphide oxidoreductase	Redox	Oxidoreductase possibly glutathione or mucuric	0
EhG4689.1	EhG4689EhG11768	EhG11768.3,EhG4689.1	CAP82	1	7.643	6	none	91	16	8	24	21	8	1	5	8	22	69	8.28025	other localisation	NA		none	OG0040867	E_huxleyi	Coccolithophore specific in 1/6 species	complete	NA	NA	NA	1
EhG5665.2	EhG5665.2	EhG5665.17,EhG5665.36,EhG5665.21,EhG5665.34,EhG5665.20,EhG5665.1,EhG5665.46,EhG5665.24,EhG5665.2	CAP139	1	3.123	23	none	190	37	29	39	69	1	1	13	1	16	174	74.2188	other localisation	OST3_OST6|PF04756.13|1.9e-05,Rad60-SLD|PF11976.8|3.6e-15,Thioredoxin_2|PF13098.6|0.00028,Thioredoxin_9|PF14595.6|8.5e-06,AhpC-TSA|PF00578.21|0.0003,Ubiquitin_2|PF14560.6|0.00074,Thioredoxin_8|PF13905.6|1.5e-05,Ubiquitin_2|PF14560.6|0.00066,Thioredoxin_7|PF13899.6|5.4e-06,ubiquitin|PF00240.23|2.3e-33,Rad60-SLD|PF11976.8|3.6e-15,Thioredoxin|PF00085.20|1e-30,ubiquitin|PF00240.23|2.3e-33	210921,66206,66230,66276,66281,278693,87744,87745,87746,87747,87748,87749,87750,87751,87752,87753,87754,87755,87756,262442,262443,262444,262445,262446,262447,262448,262449,262450,262451,262452,262453,262454,265758,269164,405501,405502,405503,398458,79229,103036,356210,356211,356212,310950	none	OG0000023	Archaeplastida	NA	complete	Ubiquitin / thioredoxin	unknown	Only protein in NCBI with this combination. Fused gene models? Also in JGI EMIHUDRAFT_436615	0
EhG6377.2	EhG6377EhG14856	EhG6377.3,EhG14856.1,EhG6377.2	CAP91	1	35.417	8	none	20	1	2	7	7	0	0	3	0	3	17	10.4167	other localisation	Pro_isomerase|PF00160.21|8e-46	7.94754e+16	none	OG0000022	Archaeplastida	NA	5primepartial	Cyclophilin type peptidyl-prolyl cis-trans isomerase/CLD	Protein folding		0
EhG8400.4	EhG8400EhG38068	EhG8400.3,Br4505.t2,EhG8400.4,EhG38068.1,EhG8400.2,Br54204.t1,EhG38068.3,EhG38068.6	CAP67	1	20.339	5	none	5	0	1	2	1	0	0	1	0	1	4	4.23729	other localisation	NA	350434	none	OG0010603	Isochrysidales	NA	complete	NA	NA	NA	1
EhG9381.17	EhG9381EhG32198	Br1.t1,EhG9381.17,EhG32198.2,Br42693.t1	CAP47	1	38.828	15	none	45	8	14	12	9	0	0	2	0	2	43	16.4835	other localisation	Rib_5-P_isom_A|PF06026.14|3.3e-61	351398	Name:RPI (A):Thomas Mock:2007-12-05 Description:Very intron-rich RPI. There is a long orf upstream of the predicted int. Met. No clear targeting possible. No clear signal/transit peptide but high similarity to chloroplast targeted RPIs. RPI_A: Ribose 5-phosphate isomerase type A (RPI_A) subfamily; RPI catalyzes the reversible conversion of ribose-5-phosphate to ribulose 5-phosphate	OG0000824	Archaeplastida	NA	complete	Ribose 5-phosphate isomerase A (phosphoriboisomerase A)	Carbonate metabolism		0

## Sheet: Legend
				Protein ID	Lead protein ID of protein group
				Putative locus	Concatenation of protein IDs that may be allelic. Two proteins sharing the same putative locus ID are putative allels. Theis information is not provided for Bracker pipeline derrived IDs
				Indistinguishable proteins	Proteins indistinguishable in this experiment based on the available MS evidence
				Protein Group ID	Unique identifier of the protein group identified in the experiment (protein groups share peptide information) to which this protein belongs. If two proteins in the list have the same protein group identifier, then they share some of their peptide evidence.
				Protein Probability	1 - posterior error probability, as calculated by Protein Prophet
				Percentage coverage	Percentage of the sequence covered by the peptides identified
				Peptide count	Number of unique peptides assigned to the protein
				Modified peptides	Sequence, modification site and mass of modified peptides
				Spectral count	Number of spectra counts summed accross all conditions and replicates
				StdCa rep 1	Number of spectral counts from the Std-Ca condition, replicate 1
				StdCa rep2	Number of spectral counts from the Std-Ca condition, replicate 2
				StdCa rep3	Number of spectral counts from the Std-Ca condition, replicate 3
				StdCa rep4	Number of spectral counts from the Std-Ca condition, replicate 4
				LowCa rep1	Number of spectral counts from the Low-Ca condition, replicate 1
				LowCa rep2	Number of spectral counts from the Low-Ca condition, replicate 2
				LowCa rep3	Number of spectral counts from the Low-Ca condition, replicate 3
				LowCa rep4	Number of spectral counts from the Low-Ca condition, replicate 4
				LowCa sum	Sum of spectral counts from the four Low-Ca replicates
				StdCa sum	Sum of spectral counts from the four Std-Ca replicates
				Normalized spectral counts	Spectral counts normalized to the length of the protein sequences (counts per 100 residues)
				localization	Localization as predicted by Hectare
				Pfam terms	Pfam terms: comma separated, giving name, code and e-value
				Identical Emihu1 proteins	Proteins in the Emihu1 database 100% identical to this protein
				Emihu1 annotation	Annotation of any identical proteins in the Emihu1 database
				orthogroup	Orthogroup number
				OG age	Age of the orthogroup this protein belongs to
				OG notes	Notes on Orthogroup
				ORF completeness	If the ORF was classed as complete by Transdecoder or gmst during the ORF finding process. If labelled incomplete this may be an incomplete gene model.
				Annotation	Annotation based on EggNOG annotation, pfam domains and blast searches
				Functional category	Based on Annotation
				Further information	Further notes on putative functions
				Number of transmembrane domains	Number of predicted TM domains
